1 **Title: A Lethal Genetic Incompatibility between Naturally Hybridizing Species in**  
2 **Mitochondrial Complex I**

3  
4 **One sentence summary:** Accelerated evolution of three interacting nuclear and mitochondrial  
5 genes underlies a lethal incompatibility in swordtail hybrids.

6  
7 **Authors:** Benjamin M. Moran<sup>1,2\*</sup>, Cheyenne Y. Payne<sup>1,2</sup>, Daniel L. Powell<sup>1,2</sup>, Erik N. K.  
8 Iverson<sup>3</sup>, Shreya M. Banerjee<sup>1</sup>, Quinn K. Langdon<sup>1</sup>, Theresa R. Gunn<sup>1</sup>, Fang Liu<sup>4</sup>, Rowan  
9 Matney<sup>4</sup>, Kratika Singhal<sup>4</sup>, Ryan D. Leib<sup>4</sup>, Osvaldo Hernandez-Perez<sup>2</sup>, Russell Corbett-Detig<sup>5,6</sup>,  
10 Manfred Schartl<sup>7,8</sup>, Justin C. Havird<sup>3</sup>, Molly Schumer<sup>1,2,9\*</sup>

11  
12 **Affiliations:**

13 <sup>1</sup>Department of Biology, Stanford University, Stanford, CA, USA

14 <sup>2</sup>Centro de Investigaciones Científicas de las Huastecas “Aguazarca”, A.C., Calnali, Hidalgo,  
15 Mexico

16 <sup>3</sup>Department of Integrative Biology, University of Texas, Austin, TX, USA

17 <sup>4</sup>Stanford University Mass Spectrometry Core, Stanford University, Stanford, CA, USA

18 <sup>5</sup>Genomics Institute, University of California, Santa Cruz, CA, USA

19 <sup>6</sup>Department of Biomolecular Engineering, University of California, Santa Cruz, CA, USA

20 <sup>7</sup>The Xiphophorus Genetic Stock Center, Texas State University, San Marcos, TX 78666

21 <sup>8</sup>Developmental Biochemistry, Biozentrum, University of Würzburg, 97070 Würzburg, Germany

22 <sup>9</sup>Hanna H. Gray Fellow, Howard Hughes Medical Institute, Stanford, CA, USA

23 \*Correspondence: [benmoran@stanford.edu](mailto:benmoran@stanford.edu), [schumer@stanford.edu](mailto:schumer@stanford.edu)

24 **Abstract**

25           The evolution of reproductive barriers is fundamental to the formation of new species and  
26 can help us understand the diversification of life on Earth. These reproductive barriers often take  
27 the form of “hybrid incompatibilities,” where genes derived from two different species no longer  
28 interact properly. Theory predicts that incompatibilities involving multiple genes should be  
29 common and that rapidly evolving genes will be more likely to cause incompatibilities, but  
30 empirical evidence has lagged behind these predictions. Here, we describe a mitonuclear  
31 incompatibility involving three genes within respiratory Complex I in naturally hybridizing  
32 swordtail fish. Individuals with specific mismatched protein combinations fail to complete  
33 embryonic development while those heterozygous for the incompatibility have reduced function  
34 of Complex I and unbalanced representation of parental alleles in the mitochondrial proteome.  
35 We localize the protein-protein interactions that underlie the incompatibility and document  
36 accelerated evolution and introgression in the genes involved. This work thus provides a precise  
37 characterization of the genetic architecture, physiological impacts, and evolutionary origin of a  
38 multi-gene incompatibility impacting naturally hybridizing species.

39

40

41 **Main text**

42

43           Biologists have long been fascinated by the question of how new species are formed and  
44 what mechanisms maintain isolation between them. One key factor in the formation and  
45 maintenance of new species is the emergence of genetic incompatibilities that reduce viability or  
46 fertility in hybrids. When species diverge from each other, they accumulate unique sets of  
47 mutations (1). As originally described by the Dobzhansky-Müller model of hybrid  
48 incompatibility (DMI model; 2, 3), when these mutations are brought together in hybrids, they  
49 may interact poorly, given that they have never been tested against one another by selection. Due  
50 to the technical challenges of identifying these interactions (4), only a handful of genes involved  
51 in hybrid incompatibilities have been precisely mapped (5) and exploration of the functional and  
52 evolutionary causes of hybrid incompatibilities has been limited to a small number of cases in  
53 model organisms (4).

54           As a consequence of this knowledge gap, key predictions about the genetic architecture  
55 of hybrid incompatibilities and the evolutionary processes that drive their emergence remain  
56 untested. For one, theory suggests that incompatibilities should be more common within dense  
57 gene networks, both because the number of potentially incompatible genotypes explodes as the  
58 complexity of the genetic interaction increases and because genes involved in such interactions  
59 are expected to be tightly co-evolving (6, 7). Consistent with this prediction, mutagenesis  
60 experiments have highlighted the sensitivity of multi-protein interactions to changes in any of  
61 their components (6). However, genetic interactions are notoriously difficult to detect  
62 empirically except in systems with especially powerful genetic tools (8), and this problem is  
63 exacerbated with complex genetic interactions (9, 10). Such technical challenges may explain

64 their rarity in the empirical literature (6, but see 11–14). Another largely untested prediction is  
65 that rapid molecular evolution will increase the rate at which incompatibilities accumulate  
66 between species (4, 5, 15). While several incompatibilities identified to date show signatures of  
67 positive selection, it is unclear how unusual rates of protein evolution are in genes involved in  
68 hybrid incompatibilities relative to the genomic background (5, 15).

69 Another open question is the degree to which the genes involved in hybrid  
70 incompatibilities may be predictable from their molecular or evolutionary properties. The  
71 mitochondrial genome, in particular, has been proposed as a hotspot for the accumulation of  
72 genetic incompatibilities (16, 17). Mitochondria are essential for energy production in nearly all  
73 eukaryotic organisms (18). In addition to this critical role, the particularities of mitochondrial  
74 inheritance and function might drive the rapid evolution of hybrid incompatibilities between  
75 species. Uniparental inheritance of mitochondria is predominant in animals, plants, and many  
76 fungi (19), creating the potential for sexually antagonistic selection (20, 21). In many animals,  
77 mitochondrial genomes also experience elevated mutation rates relative to the nuclear genome  
78 which, combined with reduced effective population size and a lack of recombination, results in  
79 up to ~25X higher mitochondrial substitution rates in some species (22–24). At the same time,  
80 nuclear and mitochondrial gene products must directly interact with each other in key steps of  
81 ATP synthesis, increasing the likelihood of coevolution between these genomes (25, 26). These  
82 molecular and evolutionary factors suggest that interactions between mitochondrial- and nuclear-  
83 encoded proteins could play an outsized role in the emergence of hybrid incompatibilities (16).

84 Although few studies have successfully identified the individual genes underlying hybrid  
85 incompatibilities (4, 5), crosses in numerous species have provided indirect evidence for the  
86 prevalence of mitonuclear incompatibilities, since hybrid viability often depends on the identity



87 of the maternal species (27–30). However, the field has struggled to move beyond these coarse-  
88 scale patterns, especially in non-model systems where large mapping experiments can be  
89 infeasible. Despite predictions that mitonuclear incompatibilities play a disproportionate role in  
90 the evolution of reproductive isolation, few studies have mapped mitonuclear incompatibilities to  
91 the single gene level (31–34) and none of those identified to date have been studied in species  
92 that naturally hybridize.

93         As we make progress identifying the individual genes underlying hybrid  
94 incompatibilities, the next frontier is evaluating the processes that drive their evolution. Here, we  
95 use an integrative approach to precisely map the genetic basis of a lethal mitonuclear hybrid  
96 incompatibility in swordtail fish and to uncover its evolutionary history. Sister species  
97 *Xiphophorus birchmanni* and *X. malinche* began hybridizing in the last ~100 generations in  
98 multiple river systems (35) after premating barriers were disrupted by habitat disturbance (36),  
99 and are a powerful system to study the emergence of hybrid incompatibilities in young species.  
100 Given their recent divergence (~250,000 generations; 0.5% divergence per basepair; 37), some  
101 hybrids between *X. birchmanni* and *X. malinche* are viable and fertile, while others experience  
102 strong selection against incompatibilities (37, 38). Leveraging data from controlled laboratory  
103 crosses and natural hybrid zones, we pinpoint three genes that generate a lethal mitonuclear  
104 hybrid incompatibility, characterize its developmental and physiological effects, and trace its  
105 evolutionary history.

106

107

108

109

## 110 **Admixture Mapping Reveals a Lethal Mitonuclear Incompatibility**

111

112 To identify loci under selection in *X. birchmanni* × *X. malinche* hybrids, we generated  
113 ~1X low-coverage whole-genome sequence data for 943 individuals from controlled laboratory  
114 crosses and 281 wild-caught hybrid adults, and applied a hidden Markov model to data at  
115 629,524 ancestry-informative sites in order to infer local ancestry (~1 per kb; 39, 40;  
116 Supplementary Materials 1.1.1-1.1.4). Using these results, we found evidence for a previously  
117 unknown incompatibility between the nuclear and mitochondrial genomes of *X. birchmanni* and  
118 *X. malinche* (Supplementary Materials 1.1.4-1.1.7). Our first direct evidence came from  
119 controlled laboratory crosses (Supplementary Materials 1.1.1, 1.1.2). Because the cross is largely  
120 unsuccessful in the opposite direction, all lab-bred hybrids were the offspring of F<sub>1</sub> hybrids  
121 generated between *X. malinche* females and *X. birchmanni* males and harbored a mitochondrial  
122 haplotype derived from the *X. malinche* parent species. Offspring of F<sub>1</sub> intercrosses are expected  
123 to derive on average 50% of their genome from each parent species. This expectation is satisfied  
124 genome-wide and locally along most chromosomes in F<sub>2</sub> hybrids (on average 50.3% *X. malinche*  
125 ancestry; Fig. S1). However, we detected severe segregation distortion along a 6.5 Mb block of  
126 chromosome 13, where average ancestry among surviving individuals was 67% *X. malinche*.  
127 Closer examination of genotypes in a 3.75 Mb subregion showed that almost none of the  
128 surviving individuals harbored homozygous *X. birchmanni* ancestry in this region of  
129 chromosome 13 (Fig. 1A; Fig. S2; 0.5% observed vs 25% expected). This pattern is unexpected  
130 even in the case of a lethal nuclear-nuclear incompatibility (where we should recover  
131 homozygous *X. birchmanni* ancestry in 6% of individuals; Supplementary Materials 1.1.2), but is  
132 consistent with a lethal mitonuclear incompatibility. Using approximate Bayesian computation

133 (ABC) approaches we asked what strength of selection against *X. birchmanni* ancestry in this  
134 region was consistent with the genotypes and ancestry deviations observed. We estimated  
135 posterior distributions of selection and dominance coefficients and found that inferred selection  
136 on this genotype in F<sub>2</sub>s is largely recessive and essentially lethal (maximum a posteriori estimate:  
137  $h = 0.12$  and  $s = 0.996$ , 95% credible interval  $h = 0.010-0.194$  and  $s = 0.986-0.999$ ; Fig. 1D,  
138 Supplementary Materials 1.2.1-1.2.2).

139 To directly evaluate evidence for a mitonuclear incompatibility and pinpoint the region  
140 involved on chromosome 13, we leveraged data from natural hybrid populations. Most naturally  
141 occurring *X. birchmanni* × *malinche* hybrid populations are fixed for mitochondrial haplotypes  
142 from one parental species (Supplementary Materials 1.1.6). However, a few segregate for the  
143 mitochondrial genomes of both parental types, and we focused on one such population (the  
144 “Calnali Low” population, hereafter the admixture mapping population). Admixture mapping of  
145 mitochondrial ancestry (controlling for genome-wide ancestry) revealed a sharp peak of  
146 association that spanned approximately 380 kb within the region of chromosome 13 identified  
147 using F<sub>2</sub> crosses (Fig. 1B; Fig. S3; Supplementary Materials 1.1.5). We replicated this signal in  
148 another hybrid population (Fig. S4).

149 Of the 32 genes in this region (Table S1), two had known mitochondrial functions, but  
150 only one, the NADH dehydrogenase ubiquinone iron-sulfur protein 5 (*ndufs5*), directly interacts  
151 with mitochondrially encoded proteins. Using three natural hybrid populations that had fixed the  
152 mitochondrial haplotype of one of the parental species (Fig. S5), we fine-mapped the  
153 incompatible mitochondrial interactor within the 380 kb admixture mapping peak. All  
154 populations showed a depletion of non-mitochondrial parent ancestry at *ndufs5* (Supplementary

155 Materials 1.1.6), implicating it as the nuclear component of the mitonuclear incompatibility (Fig.  
156 1C).

157         Given that hybrids with *X. malinche* mitochondria and homozygous *X. birchmanni*  
158 ancestry at *ndufs5* suffer hybrid lethality, we investigated evidence for selection on the opposite  
159 genotype combination (*X. birchmanni* mitochondria and homozygous *X. malinche* ancestry at  
160 *ndufs5*) using hybrids from the admixture mapping population (Supplementary Materials 1.2.1;  
161 Fig. S6). We found that this genotype combination was also observed at unexpectedly low  
162 frequencies (Fig. 1D, 1G;  $p < 10^{-4}$  by simulation, Supplementary Materials 1.2.1) and inferred to  
163 be under strong selection, albeit much weaker than the opposite ancestry combination (maximum  
164 a posteriori estimate: 0.17, 95% credible intervals 0.08-0.55; Fig. 1D, Supplementary Materials  
165 1.2.2). We focus primarily on the incompatibility involving the *X. malinche* mitochondria in our  
166 results below (Fig. 1G) but discuss this reciprocal incompatibility in Supplementary Materials  
167 1.2.3.

168

### 169 **Mitonuclear incompatibility in *X. birchmanni* × *X. malinche* hybrids involves three genes**

170

171         Mitochondrial protein respiratory Complex I is the first component of the electron transport  
172 chain that ultimately allows the cell to generate ATP. In vertebrates, this complex has a total of  
173 47 subunits and assembly factors, including *ndufs5* (Table S2). While the genome-wide scan that  
174 we used to identify *ndufs5* is an unbiased method to search for mitochondrially interacting loci, it  
175 has low power given our sample size. After determining that genes in Complex I were involved  
176 in the incompatibility, we performed targeted analyses to determine if other genes in this  
177 complex appear to be under selection in hybrids (Fig. S7-S8; Supplementary Materials 1.1.7).

178 This analysis identified a significant interaction between mitochondrial ancestry and another  
179 member of Complex I, the *ndufa13* gene on chromosome 6 (Supplementary Materials 1.1.7;  
180 Bonferroni corrected p-value = 0.02). This indicates that the *X. malinche* mitochondria is actually  
181 incompatible with at least two other genes (Fig. 1G), although we discuss uncertainty about the  
182 exact architecture of the interaction in Supplementary Materials 1.1.8.

183 Depletion of non-mitochondrial parent ancestry at *ndufa13* was unidirectional (Fig. 1E),  
184 consistent with selection acting only against the combination of the *X. malinche* mitochondria  
185 with homozygous *X. birchmanni* ancestry at *ndufa13* (see Supplementary Materials 1.2.3 for  
186 more detail). Notably, we also detect selection on *ndufa13* in our dataset of lab-bred hybrids that  
187 harbor *X. malinche* mitochondria. The proportion of individuals with homozygous *X. birchmanni*  
188 ancestry at *ndufa13* is 3% (compared to 0.5% at *ndufs5* and 25% expected genome-wide).  
189 However, ABC approaches indicate that selection against the mismatch between *X. malinche*  
190 mitochondria and homozygous *X. birchmanni* ancestry at *ndufa13* is also severe (maximum a  
191 posteriori estimate: 0.91, 95% credible interval 0.87-0.94; Fig. 1E, Supplementary Materials  
192 1.2.2).

193

### 194 **Lethal Effect of Incompatibility in Early Development**

195

196 The incompatibility involving the *X. malinche* mitochondria appears to be lethal by the  
197 time individuals reach adulthood. To pinpoint the developmental timing of the incompatibility,  
198 we genotyped pregnant females from the admixture mapping population and recorded the  
199 developmental stages of their embryos (41; swordtails are livebearing fish). We focused on the  
200 interaction between *X. malinche* mitochondria and homozygous *X. birchmanni* ancestry at

201 *ndufs5*, given that we did not detect an effect of ancestry at *ndufa13* on developmental stage (Fig.  
202 S9-10; Supplementary Materials 1.3.1). While developmental asynchrony is typically on the  
203 scale of 0-2 days in pure species (42; Supplementary Materials 1.3.1), we observed much greater  
204 variation in broods collected from the admixture mapping population where the mitochondrial  
205 incompatibility is segregating (e.g. stages normally separated by 12 days of development found  
206 in the same brood; Supplementary Materials 1.3.1; Fig. 2A-B). Genotyping results revealed that  
207 lethal mitonuclear genotype combinations were present in embryos at early developmental  
208 stages, but that these embryos failed to reach a phenotype beyond that typical of the first seven  
209 days of gestation (the full length of gestation is ~21 days in *Xiphophorus*; Fig. 2A). Comparing  
210 siblings with incompatible and compatible genotypes revealed a nearly universal lag in  
211 development between individuals with incompatible genotypes and the most fully developed  
212 individual in their brood (Fig. 2B, 2C). This developmental lag could itself cause mortality, since  
213 *Xiphophorus* embryos that do not complete embryonic development within the mother fail to  
214 survive more than a few days after birth (Supplementary Materials 1.3.1).

215

## 216 **Mitochondrial Biology in Hybrids**

217

218 The phenotypes of developing embryos suggest that the incompatibility may inhibit  
219 somatic growth and development, likely through mitochondrial dysfunction. Given that  
220 individuals with the incompatibility involving the *X. malinche* mitochondria generally do not  
221 complete embryonic development, we turned to F<sub>1</sub> hybrids between *X. birchmanni* and *X.*  
222 *malinche* to further explore the hybrid incompatibility *in vivo*. Since F<sub>1</sub> hybrids, which derive  
223 their mitochondria from *X. malinche* and are heterozygous for ancestry at *ndufs5* and *ndufa13*,

224 are largely viable, we asked whether there was evidence for compensatory nuclear or  
225 mitochondrial regulation that might be protective in F<sub>1</sub> hybrids. We found no evidence for allele-  
226 specific expression of *ndufs5* or *ndufa13* in F<sub>1</sub> hybrids (Supplementary Materials 1.3.2; Fig. S11-  
227 12) or significant differences in mitochondrial copy number in F<sub>1</sub> hybrids (Supplementary  
228 Materials 1.3.3; Fig. S13).

229 With no clear indication of a compensatory regulatory response, we reasoned that we  
230 might be able to detect reduced mitochondrial function, particularly in respiratory Complex I, in  
231 hybrids heterozygous for the incompatibility. To examine mitochondrial function in *X.*  
232 *birchmanni*, *X. malinche*, and hybrids harboring the *X. malinche* mitochondria and heterozygous  
233 ancestry at *ndufs5* and *ndufa13*, we quantified respiratory phenotypes in isolated mitochondria  
234 using a multiple substrate, uncoupler, and inhibitor titration protocol with the Oroboros O2K  
235 respirometer (Fig. S14; Supplementary Materials 1.3.4). We found that Complex I efficiency was  
236 significantly lower in hybrids compared to the two parental species (Fig. 2D; Fig. S15,  $P =$   
237 0.023,  $n = 7$  per genotype), although overall levels of mitochondrial respiration were unchanged  
238 (Fig. 2E,  $P = 0.97$ ; Supplementary Materials 1.3.4). This points to reduced function of Complex I  
239 in heterozygous individuals, as well as possible physiological compensation by other  
240 components in the oxidative phosphorylation pathway.

241 Given physiological evidence for reduced Complex I function in hybrids heterozygous at  
242 *ndufs5* and *ndufa13*, we predicted that there might be an altered frequency of protein complexes  
243 incorporating both *X. malinche* mitochondrial proteins and *X. birchmanni* proteins at *ndufs5* and  
244 *ndufa13* in F<sub>1</sub> hybrids. To test this prediction, we took a mass spectrometry based quantitative  
245 proteomics approach. We used stable isotope-labeled peptides to distinguish between the *X.*  
246 *birchmanni* and *X. malinche* *ndufs5* and *ndufa13* peptides in mitochondrial proteomes extracted

247 from F<sub>1</sub> hybrids (see Supplementary Materials 1.4.1-1.4.4). While native *ndufa13* peptides were  
248 too rare to quantify accurately, we found consistent deviations from the expected 50-50 ratio of  
249 *X. birchmanni* to *X. malinche* peptides for *ndufs5* in F<sub>1</sub> hybrids, with a significant  
250 overrepresentation of *ndufs5* derived from *X. malinche* in the mitochondrial proteome (Fig. 2G-  
251 H; Supplementary Materials 1.4.5). Since we did not observe allele-specific expression of *ndufs5*  
252 (Fig 2F; Supplementary Materials 1.3.2; Fig. S11-12), this result is consistent with  
253 disproportionate degradation of *X. birchmanni*-derived *ndufs5* peptides in the mitochondrial  
254 proteome or differences in translation of *ndufs5* peptides from the two species.

255

### 256 **Substitutions in two mitochondrial proteins contact *ndufs5* and *ndufa13***

257

258 While we can leverage the independent recombination histories of natural hybrid  
259 populations to pinpoint the nuclear components of the hybrid incompatibility, we cannot take this  
260 approach to distinguish among the 37 genes in the swordtail mitochondrial genome, which do  
261 not undergo meiotic recombination. To investigate the possible mitochondrial partners of *ndufs5*  
262 and *ndufa13*, we therefore turned to protein modeling, relying on high quality cryo-EM based  
263 structures (43–45).

264 Barring a hybrid incompatibility generated by regulatory divergence, which we address in  
265 Supplementary Materials 1.3.2, we expect hybrid incompatibilities to be driven by amino acid  
266 changes in the interacting proteins (46). We used the program RaptorX (47) to generate predicted  
267 structures of *X. birchmanni* and *X. malinche ndufs5*, *ndufa13*, and nearby Complex I  
268 mitochondrial and nuclear genes, which we aligned to a mouse cryo-EM Complex I structure  
269 (Fig. 3A; Fig. S16; 43). Using this structure, we detected amino acid substitutions between *X.*



270 *birchmanni* and *X. malinche* at the interfaces of *ndufs5*, *ndufa13* and four mitochondrially  
271 encoded genes: *nd2*, *nd3*, *nd4l*, and *nd6* (Fig. 3A). Notably, one *ndufs5* substitution directly  
272 contacts a substitution in *nd2* (Fig. 3B, Fig. S16). An unstructured loop in *nd6* that passes  
273 between *ndufs5* and *ndufa13* harbors substitutions between *X. birchmanni* and *X. malinche* in 4  
274 out of 22 amino acids that make up the loop, including one that is predicted to be in close  
275 proximity to a substitution in *ndufs5* (Fig 3B, Fig. S16; Supplementary Materials 1.4.6). Results  
276 of these structural predictions were robust to a number of technical variables (Supplementary  
277 Materials 1.4.6). The direct contact between species-specific mitochondrial and nuclear  
278 substitutions point to *nd2* and *nd6* as the genes most likely to be involved in the mitochondrial  
279 component of the hybrid incompatibility (Fig. 3A, 3B; Fig. S17).

280

## 281 **Rapid evolution of Complex I proteins**

282

283 Theory predicts that hybrid incompatibilities are more likely to arise in rapidly evolving  
284 genes (4, 5, 15). Consistent with this hypothesis, *ndufs5* is among the most rapidly evolving  
285 genes genome-wide between *X. birchmanni* and *X. malinche* (Fig. 3C, 3D). Aligning the *ndufs5*  
286 coding sequences of *X. birchmanni*, *X. malinche*, and twelve other swordtail species revealed  
287 that all four amino acid substitutions that differentiate *X. birchmanni* and *X. malinche* at *ndufs5*  
288 were derived on the *X. birchmanni* branch (Fig. 3C). Phylogenetic tests indicate that there has  
289 been accelerated evolution of *ndufs5* on this branch ( $dN/dS > 99$ ,  $N = 4$ ,  $S = 0$ , CodeML branch  
290 test  $P = 0.005$ , Fig. 3C). Similar patterns of rapid evolution are observed at *ndufa13*, which also  
291 showed evidence for accelerated evolution in *X. birchmanni* (Fig. 3E,  $dN/dS = 1.2$ ,  $N = 3$ ,  $S = 1$ ,  
292 CodeML branch test  $P = 0.002$ ).

293 Rapid evolution of *ndufs5* and *ndufa13* may be the result of coevolution with  
294 mitochondrial substitutions, a mechanism that has been proposed to explain the outsized role of  
295 the mitochondria in hybrid incompatibilities (16, 48). Indeed, there is an excess of derived  
296 substitutions in the *X. birchmanni* mitochondrial protein *nd6*, one of the proteins that interacts  
297 with *ndufs5* and *ndufa13* (Table S3, Fig. S18; CodeML branch test  $P = 0.005$ ). Moreover, a  
298 number of the substitutions in both mitochondrial and nuclear genes are predicted to have  
299 functional consequences (Supplementary Materials 1.5.1; Table S4, Fig. S19-20) and occur in  
300 regions of direct protein-protein interaction between *ndufs5*, *ndufa13*, *nd2*, and *nd6* (Fig. 3A,  
301 3B). Such colocalization of substitutions predicted to affect protein structure is precisely what  
302 would be expected under classic models of hybrid incompatibility.

303

#### 304 **Introgression of genes underlying mitonuclear incompatibility**

305

306 The presence of a mitonuclear incompatibility in *Xiphophorus* is especially intriguing, given  
307 previous reports that mitochondrial genomes may have introgressed between species (49). While  
308 *X. malinche* and *X. birchmanni* are sister species based on the nuclear genome, they are  
309 mitochondrially divergent, with *X. malinche* and *X. cortezi* grouped as sister species based on the  
310 mitochondrial phylogeny (Fig. 4A; 49). As we show, all *X. cortezi* mitochondria sequenced to  
311 date are nested within *X. malinche* mitochondrial diversity (Fig. 4B; Supplementary Materials  
312 1.5.2; Fig. S19-S21), including the interacting mitochondrial genes *nd2* and *nd6* (Fig. 3A).  
313 Simulations indicate that gene flow, rather than incomplete lineage sorting, likely drove  
314 replacement of the *X. cortezi* mitochondria with the *X. malinche* sequence ( $P < 0.002$  by  
315 simulation; Fig. 4C; Supplementary Materials 1.5.3-1.5.4).

316 The introgression of the mitochondrial genome from *X. malinche* into *X. cortezi* suggests the  
317 possibility that other Complex I genes may have co-introgressed (50). Indeed, the nucleotide  
318 sequence for *ndufs5* is identical between *X. malinche* and *X. cortezi*, and the sequence of *ndufa13*  
319 differs by a single synonymous mutation (although conservation of both genes is high throughout  
320 *Xiphophorus*; Fig. S22-23). Identical amino acid sequences at the genes underlying the hybrid  
321 incompatibility between *X. malinche* and *X. birchmanni* suggest that *X. cortezi* and *X.*  
322 *birchmanni* are likely to harbor the same mitonuclear incompatibility, as a result of ancient  
323 introgression between *X. malinche* and *X. cortezi* (Supplementary Materials 1.5.3-1.5.4). This  
324 inference is supported by analysis of ancestry in two contemporary *X. birchmanni* × *X. cortezi*  
325 hybrid zones, which reveals a significant depletion of non-mitochondrial parent ancestry at  
326 *ndufs5* and *ndufa13* (Fig. 4D, Supplementary Materials 1.5.5; 51). These results are consistent  
327 with the mitonuclear incompatibility observed in *X. birchmanni* × *X. malinche* being active in *X.*  
328 *birchmanni* × *X. cortezi* populations (see also 51). This exciting finding hints that genes  
329 underlying hybrid incompatibilities can introgress together, transferring incompatibilities  
330 between related species.

331

## 332 **Implications**

333

334 An open question in the field is what genetic and evolutionary forces drive the emergence of  
335 hybrid incompatibilities, especially between closely related species. We identified a mitonuclear  
336 incompatibility that involves at least three genes and causes hybrid lethality in lab and wild  
337 populations. Theory predicts that hybrid incompatibilities involving multiple genes should be  
338 common (6, 7), but with few exceptions (8, 12–14), they remain virtually uncharacterized at the

339 genic level (6). Moreover, we show that there has been exceptionally rapid evolution in both  
340 mitochondrial and interacting nuclear genes in *X. birchmanni*, which may have introduced  
341 mutations that are incompatible in hybrids (Fig. 4). Whether driven by rapid adaptation or some  
342 other mechanism, this is consistent with the hypothesis that the coevolution of mitochondrial and  
343 nuclear genes can drive the overrepresentation of mitonuclear interactions in hybrid  
344 incompatibilities (25, 26, 48).

345 Characterizing the incompatibility across multiple scales of organization allowed us to  
346 identify the mechanisms through which it acts (52–54). Our results suggest that the lethal form of  
347 the hybrid incompatibility is driven by dysfunctional protein-protein interactions in Complex I of  
348 the mitochondrial electron transport chain that cause breakdown in bioenergetic pathways. These  
349 physiological impacts are observed in hybrids heterozygous for the incompatibility, even though  
350 these individuals escape its lethal effects.

351 Finally, this mitonuclear incompatibility provides a new case in which the same genes are  
352 involved in incompatibilities across multiple species (55–57). Surprisingly, we found that  
353 introgression has resulted in the transfer of genes underlying the incompatibility from *X.*  
354 *malinche* to *X. cortezi*, and evidence from *X. birchmanni* × *X. cortezi* hybrid populations  
355 indicates that the incompatibility is likely under selection in these populations as well. The  
356 possibility that hybridization could transfer incompatibilities between species has not been  
357 previously recognized, perhaps due to an underappreciation of the frequency of hybridization.  
358 The importance of past hybridization in the structure of present reproductive barriers is a  
359 promising area for future inquiry.

360

361

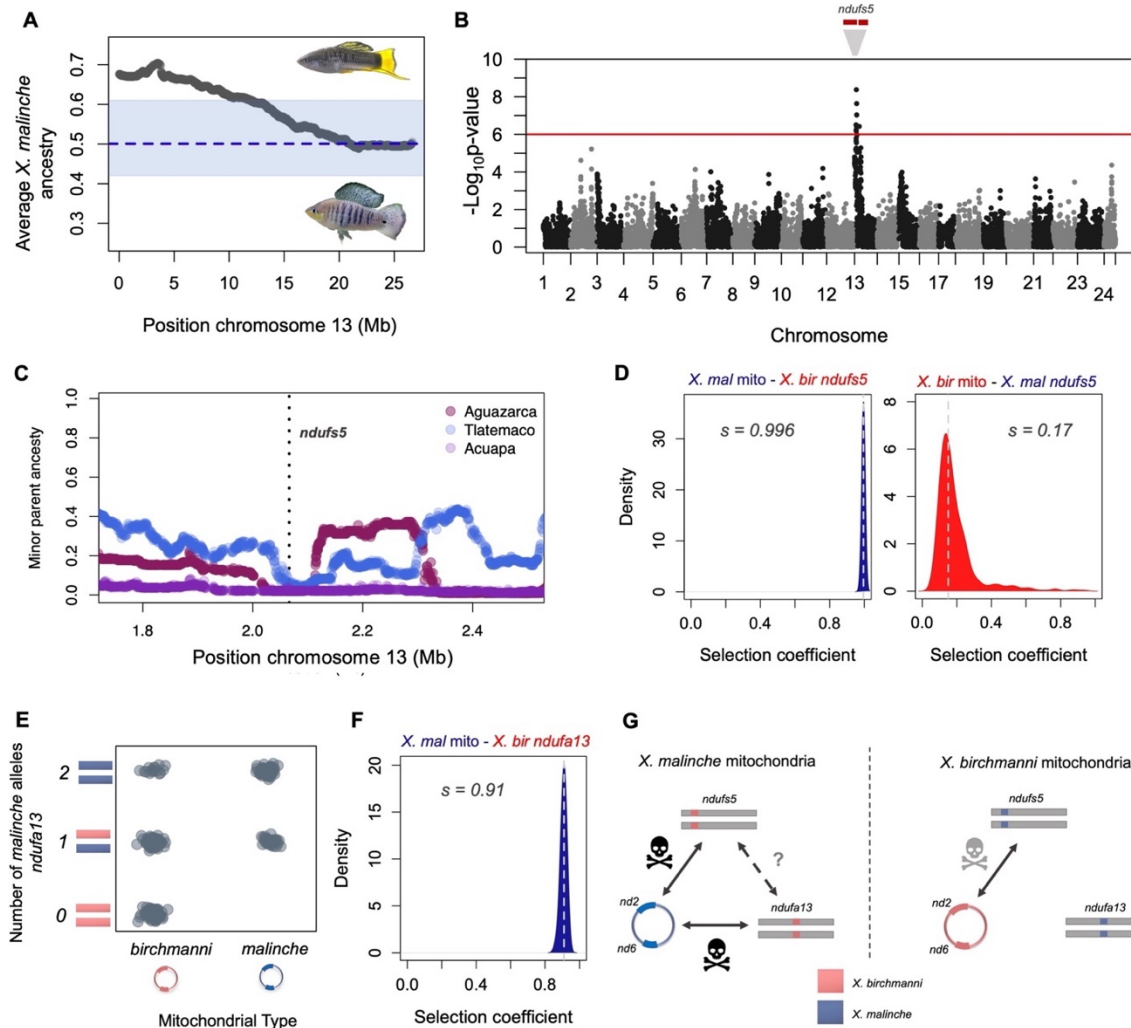

362  
 363 **Figure 1. Admixture mapping pinpoints a mitonuclear incompatibility in *Xiphophorus*.** (A) F<sub>2</sub> hybrid  
 364 offspring of a laboratory cross between *X. malinche* (top) and *X. birchmanni* (bottom) have segregation  
 365 distortion towards *X. malinche* ancestry across a large region of chromosome 13. Blue envelop shows the  
 366 99% quantiles of *X. malinche* ancestry at all ancestry informative sites genome wide. Dashed line shows  
 367 the expected *X. malinche* ancestry for this cross. (B) Admixture mapping results for association between  
 368 nuclear ancestry and mitochondrial haplotype in natural hybrids, controlling for genome-wide ancestry.  
 369 Red line indicates genome-wide significance threshold determined by simulations. (C) Non-  
 370 mitochondrial parent ancestry in natural hybrid populations fixed for *X. birchmanni* (Aguazarca, Acuapa)  
 371 or *X. malinche* (Tlatemaco) mitochondrial haplotypes. Vertical dashed line represents the position of  
 372 *ndufs5*, one of three genes in a shared ancestry desert at the center of the admixture mapping region. (D)

373 Results of approximate Bayesian computation (ABC) simulations estimating selection coefficients against  
374 heterospecific ancestry combinations at *ndufs5* and the *X. birchmanni* or *X. malinche* mitochondrial  
375 haplotypes. Shown here are posterior distributions from accepted simulations; vertical lines indicate the  
376 maximum a posteriori estimates for selection coefficient in each direction. **(E)** Observed genotype  
377 frequencies at *ndufa13* in the admixture mapping population. **(F)** Results of ABC simulations estimating  
378 the strength of selection against the combination of *X. malinche* mitochondria with *X. birchmanni*  
379 ancestry at *ndufa13*. Shown here is the posterior distribution of accepted simulations; the vertical line  
380 indicates the maximum a posteriori estimate for the selection coefficient. **(G)** Schematic of identified  
381 interactions with both the *X. malinche* and *X. birchmanni* mitochondrial genomes from our mapping data  
382 and strength of selection underlying each interaction in hybrids (gray – moderate, black – near lethal). We  
383 discuss evidence for possible interactions between *ndufs5* and *ndufa13* (indicated by the dashed line) in  
384 Supplementary Materials 1.1.8.

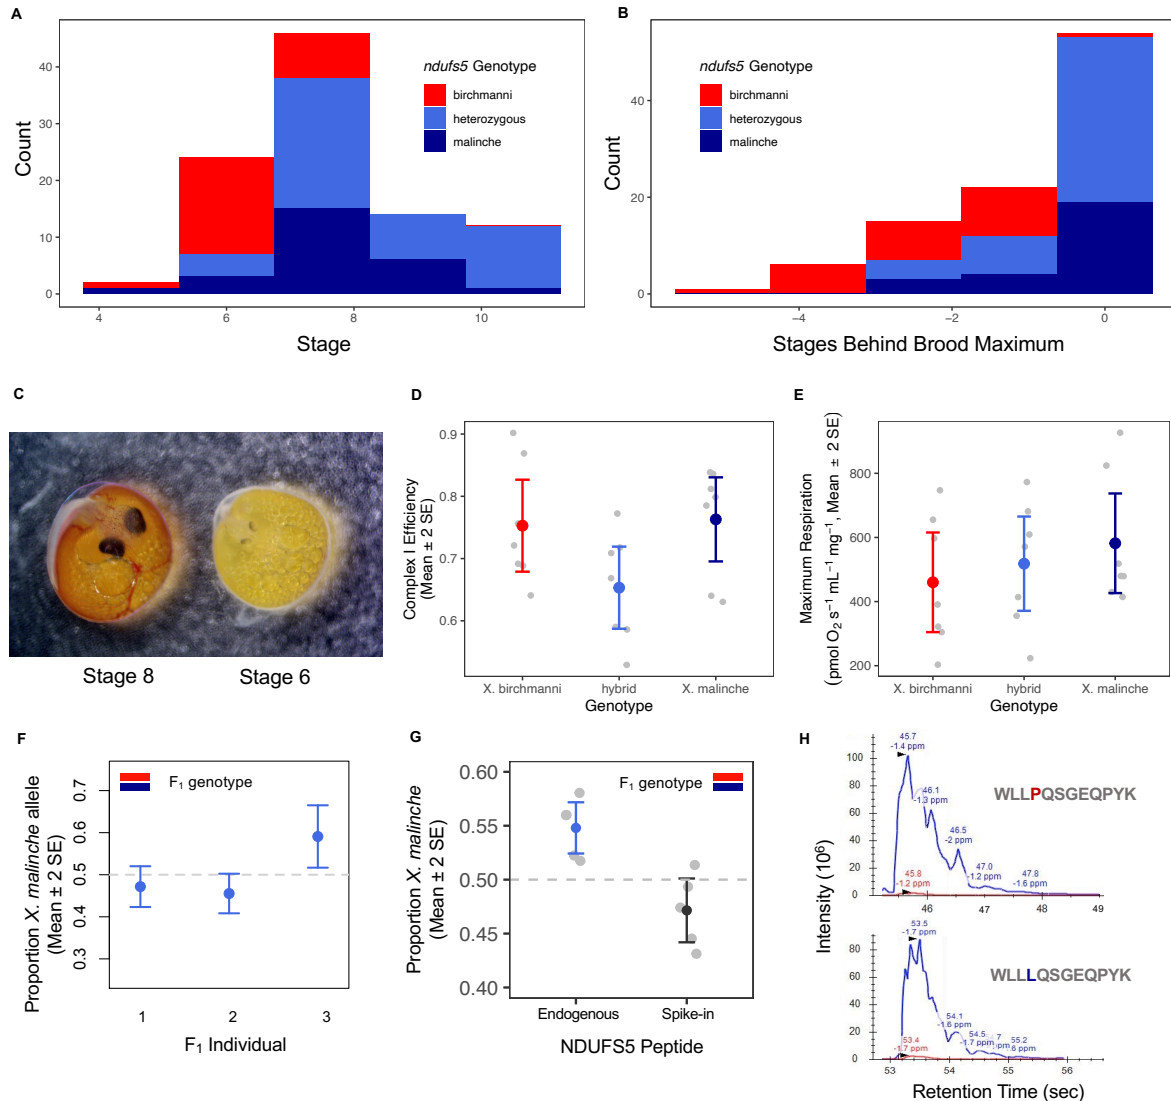

385  
 386 **Figure 2. Developmental, physiological, and proteomic phenotypes associated with the hybrid**  
 387 **incompatibility.** (A) Developmental stage and *ndufs5* genotypes of hybrid embryos with *X. malinche*  
 388 mitochondria. (B) Lag in development of hybrid embryos with *X. malinche* mitochondria compared to the  
 389 most developed embryo in the brood as a function of *ndufs5* genotype. (C) Siblings from the admixture  
 390 mapping population at different developmental stages. (D) Results of Oroboros O2K respirometer  
 391 Complex I efficiency assay for adult *X. birchmanni*, *X. malinche*, and hybrid individuals with *X. malinche*  
 392 mitochondria and heterozygous ancestry at *ndufs5* and *ndufa13* (n=7 per genotype). Colored points show  
 393 the mean, whiskers show two standard errors, and gray points show individual data. (E) Despite  
 394 differences in Complex I efficiency, maximum respiration rates do not differ between groups. (F) Allele-

395 specific expression of *ndufs5* in three adult F<sub>1</sub> hybrids. Points show the proportion of reads in F<sub>1</sub> hybrids  
396 supporting the *X. malinche* allele, bars show two standard errors. (G) Results of quantitative mass  
397 spectrometry analysis of *ndufs5* peptides in mitochondrial proteomes derived from five adult F<sub>1</sub> hybrids.  
398 Grey points show the proportion of area under the spectral curves contributed by the *X. malinche* allele in  
399 a given individual, colored points show the mean, and bars show two standard errors. The left column  
400 shows results for endogenous peptides present in F<sub>1</sub>s, the right column shows results for the control where  
401 heavy-labeled standards of each peptide were spiked in. (H) Representative Skyline traces of the *X.*  
402 *malinche* and *X. birchmanni* versions of the *ndufs5* peptide from parallel reaction monitoring. Blue lines  
403 represent the spectral intensity from heavy-labeled peptides, red lines represent endogenous peptides.  
404 Inset shows the sequence of the *X. birchmanni* and *X. malinche* peptides being detected.  
405



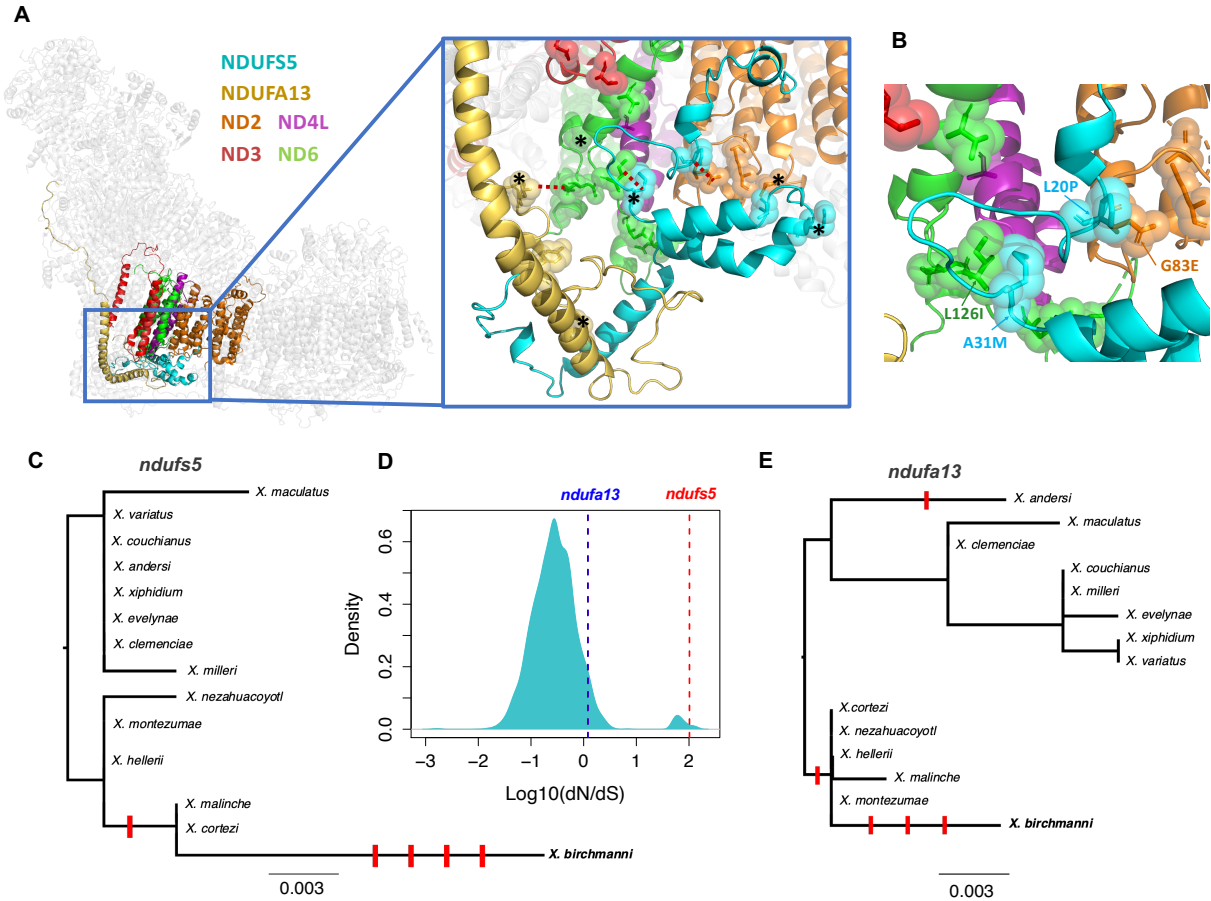

406  
 407 **Figure 3. Predicted structures of *Xiphophorus* respiratory Complex I reveal interacting**  
 408 **substitutions at protein interfaces.** (A) *Xiphophorus* respiratory Complex I structures generated by  
 409 RaptorX using alignment to a template mouse cryo-EM structure. Colored protein structures include  
 410 *ndufs5*, *ndufa13*, and the four mitochondrially encoded *nd* genes in contact with *ndufs5* or *ndufa13*. Inset  
 411 shows interaction surface between these genes. Asterisks denote residues with substitutions in *X.*  
 412 *birchmanni* predicted to affect protein function (Table S4). Dotted red lines highlight substitutions in  
 413 *ndufs5*, *ndufa13*, *nd2*, and *nd6* in close proximity. (B) Detailed view of interaction interface between  
 414 *ndufs5*, *nd2*, and *nd6*. Arrows highlight substitutions in direct contact (represented as spheres), with  
 415 letters denoting the *X. malinche* allele, the residue number, and the *X. birchmanni* allele, respectively. (C)  
 416 Gene tree for *ndufs5* generated with RAxML, highlighting an excess of substitutions along the *X.*  
 417 *birchmanni* branch. Scale bar represents number of nucleotide substitutions per site. Derived non-  
 418 synonymous substitutions are indicated by red ticks along the phylogeny. Note that spacing between ticks

419 is arbitrary. **(D)** Distribution of  $\text{Log}_{10}$  dN/dS between *X. birchmanni* and *X. malinche* across all nuclear  
420 genes in the genome with values for *ndufs5* and *ndufa13* highlighted. **(E)** Gene tree for *ndufa13* generated  
421 with RAxML, highlighting an excess of substitutions along the *X. birchmanni* branch (as in C).  
422  
423

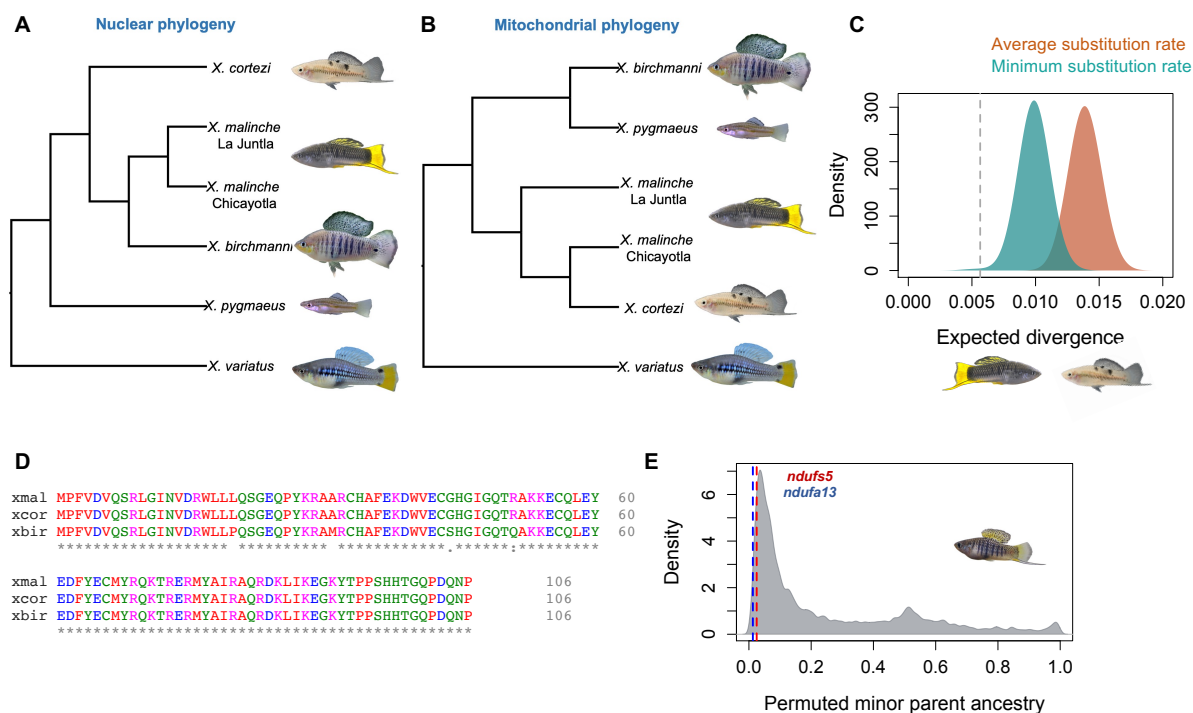

424  
 425 **Figure 4. Phylogenetic analysis and ancestry mapping suggest that genes underlying the**  
 426 **mitonuclear incompatibility have introgressed from *X. malinche* into *X. cortezi*.** (A) Nuclear  
 427 phylogeny of *Xiphophorus* species, showing that *X. birchmanni* and *X. malinche* are sister species (49).  
 428 (B) Phylogeny constructed from whole mitochondrial genome sequences showing that *X. cortezi*  
 429 mitochondria are nested within *X. malinche* mitochondrial diversity. (C) Results of simulations modeling  
 430 expected mitochondrial divergence between *X. malinche* and *X. cortezi* in a scenario with no gene flow.  
 431 Distributions represent pairwise sequence divergence in two sets of simulations. The first set used the  
 432 average mitochondrial substitution rate observed between *Xiphophorus* species (red), and the second used  
 433 the minimum mitochondrial substitution rate observed (blue). The dotted line shows observed divergence  
 434 between mitochondrial haplotypes in *X. malinche* and *X. cortezi*, indicating that past mitochondrial  
 435 introgression is more consistent with the observed data than incomplete lineage sorting (Supplementary  
 436 Materials 1.5.3). (D) Clustal alignment of *ndufs5* sequences. *X. malinche* and *X. cortezi* have identical  
 437 amino acid sequences at *ndufs5*, while *X. birchmanni* is separated from them by four substitutions. Colors  
 438 indicate properties of the amino acid, asterisks indicate locations where the amino acid sequences are

439 identical. (E) Non-mitochondrial parent ancestry is lower than expected by chance in two natural *X.*  
440 *cortezi* × *X. birchmanni* hybrid populations fixed for the *X. cortezi* mitochondrial haplotype (Fig. S24) at  
441 *ndufs5* (red line) and *ndufa13* (blue line). Gray distribution shows permutations randomly drawing 0.1  
442 centimorgan windows from the two *X. cortezi* × *X. birchmanni* hybrid populations. Inset shows a *X.*  
443 *cortezi* × *X. birchmanni* hybrid.  
444

445 **References**

- 446 1. A. J. Dagilis, M. Kirkpatrick, D. I. Bolnick, The evolution of hybrid fitness during speciation. *PLOS*  
447 *Genetics*. **15**, e1008125 (2019).
- 448 2. Th. Dobzhansky, Genetic Nature of Species Differences. *The American Naturalist*. **71**, 404–420  
449 (1937).
- 450 3. H. Müller, Isolating mechanisms, evolution, and temperature. *Biological Symposium*. **6**, 71–125  
451 (1942).
- 452 4. S. Maheshwari, D. A. Barbash, The Genetics of Hybrid Incompatibilities. *Annual Review of Genetics*.  
453 **45**, 331–355 (2011).
- 454 5. D. C. Presgraves, The molecular evolutionary basis of species formation. *Nat Rev Genet*. **11**, 175–  
455 180 (2010).
- 456 6. K. B. S. Swamy, S. C. Schuyler, J.-Y. Leu, Protein Complexes Form a Basis for Complex Hybrid  
457 Incompatibility. *Front. Genet*. **12** (2021), doi:10.3389/fgene.2021.609766.
- 458 7. H. A. Orr, The population genetics of speciation: the evolution of hybrid incompatibilities. *Genetics*.  
459 **139**, 1805–1813 (1995).
- 460 8. J. Boocock, M. J. Sadhu, A. Durvasula, J. S. Bloom, L. Kruglyak, Ancient balancing selection  
461 maintains incompatible versions of the galactose pathway in yeast. *Science*. **371**, 415–419 (2021).
- 462 9. W.-H. Wei, G. Hemani, C. S. Haley, Detecting epistasis in human complex traits. *Nat Rev Genet*. **15**,  
463 722–733 (2014).
- 464 10. W. J. Gauderman, Sample size requirements for association studies of gene-gene interaction. *Am J*  
465 *Epidemiol*. **155**, 478–484 (2002).

- 466 11. J. Boocock, M. J. Sadhu, A. Durvasula, J. S. Bloom, L. Kruglyak, Ancient balancing selection  
467 maintains incompatible versions of the galactose pathway in yeast. *Science*. **371**, 415–419 (2021).
- 468 12. N. Phadnis, E. P. Baker, J. C. Cooper, K. A. Frizzell, E. Hsieh, A. F. A. de la Cruz, J. Shendure, J. O.  
469 Kitzman, H. S. Malik, An essential cell cycle regulation gene causes hybrid inviability in *Drosophila*.  
470 *Science*. **350**, 1552–1555 (2015).
- 471 13. S. Tang, D. C. Presgraves, Evolution of the *Drosophila* Nuclear Pore Complex Results in Multiple  
472 Hybrid Incompatibilities. *Science*. **323**, 779–782 (2009).
- 473 14. J. C. Cooper, P. Guo, J. Bladen, N. Phadnis, A triple-hybrid cross reveals a new hybrid  
474 incompatibility locus between *D. melanogaster* and *D. sechellia*. *bioRxiv*, 590588 (2019).
- 475 15. N. A. Johnson, Hybrid incompatibility genes: remnants of a genomic battlefield? *Trends in Genetics*.  
476 **26**, 317–325 (2010).
- 477 16. R. S. Burton, F. S. Barreto, A disproportionate role for mtDNA in Dobzhansky–Muller  
478 incompatibilities? *Molecular Ecology*. **21**, 4942–4957 (2012).
- 479 17. G. E. Hill, Mitonuclear coevolution as the genesis of speciation and the mitochondrial DNA barcode  
480 gap. *Ecology and Evolution*. **6**, 5831–5842 (2016).
- 481 18. N. Lane, W. Martin, The energetics of genome complexity. *Nature*. **467**, 929–934 (2010).
- 482 19. C. M. Barr, M. Neiman, D. R. Taylor, Inheritance and recombination of mitochondrial genomes in  
483 plants, fungi and animals. *New Phytologist*. **168**, 39–50 (2005).
- 484 20. A. L. Case, F. R. Finseth, C. M. Barr, L. Fishman, Selfish evolution of cytonuclear hybrid  
485 incompatibility in *Mimulus*. *Proceedings of the Royal Society B: Biological Sciences*. **283**, 20161493  
486 (2016).

- 487 21. C. D. Chase, Cytoplasmic male sterility: a window to the world of plant mitochondrial–nuclear  
488 interactions. *Trends in Genetics*. **23**, 81–90 (2007).
- 489 22. J. W. O. Ballard, M. C. Whitlock, The incomplete natural history of mitochondria. *Molecular*  
490 *Ecology*. **13**, 729–744 (2004).
- 491 23. C. Haag-Liautard, N. Coffey, D. Houle, M. Lynch, B. Charlesworth, P. D. Keightley, Direct  
492 Estimation of the Mitochondrial DNA Mutation Rate in *Drosophila melanogaster*. *PLOS Biology*. **6**,  
493 e204 (2008).
- 494 24. R. Allio, S. Donega, N. Galtier, B. Nabholz, Large Variation in the Ratio of Mitochondrial to Nuclear  
495 Mutation Rate across Animals: Implications for Genetic Diversity and the Use of Mitochondrial  
496 DNA as a Molecular Marker. *Molecular Biology and Evolution*. **34**, 2762–2772 (2017).
- 497 25. N. Osada, H. Akashi, Mitochondrial–Nuclear Interactions and Accelerated Compensatory Evolution:  
498 Evidence from the Primate Cytochrome c Oxidase Complex. *Mol Biol Evol*. **29**, 337–346 (2012).
- 499 26. F. S. Barreto, R. S. Burton, Evidence for Compensatory Evolution of Ribosomal Proteins in  
500 Response to Rapid Divergence of Mitochondrial rRNA. *Molecular Biology and Evolution*. **30**, 310–  
501 314 (2013).
- 502 27. D. I. Bolnick, M. Turelli, H. López-Fernández, P. C. Wainwright, T. J. Near, Accelerated  
503 Mitochondrial Evolution and “Darwin’s Corollary”: Asymmetric Viability of Reciprocal F1 Hybrids  
504 in Centrarchid Fishes. *Genetics*. **178**, 1037–1048 (2008).
- 505 28. M. Turelli, L. C. Moyle, Asymmetric Postmating Isolation: Darwin’s Corollary to Haldane’s Rule.  
506 *Genetics*. **176**, 1059–1088 (2007).

- 507 29. Y. Brandvain, G. B. Pauly, M. R. May, M. Turelli, Explaining Darwin's Corollary to Haldane's Rule:  
508 The Role of Mitonuclear Interactions in Asymmetric Postzygotic Isolation Among Toads. *Genetics*.  
509 **197**, 743–747 (2014).
- 510 30. P. Tiffin, S. Olson, L. C. Moyle, Asymmetrical crossing barriers in angiosperms. *Proc. R. Soc. Lond.*  
511 *B.* **268**, 861–867 (2001).
- 512 31. C. D. Meiklejohn, M. A. Holmbeck, M. A. Siddiq, D. N. Abt, D. M. Rand, K. L. Montooth, An  
513 Incompatibility between a Mitochondrial tRNA and Its Nuclear-Encoded tRNA Synthetase  
514 Compromises Development and Fitness in *Drosophila*. *PLOS Genetics*. **9**, e1003238 (2013).
- 515 32. D. Luo, H. Xu, Z. Liu, J. Guo, H. Li, L. Chen, C. Fang, Q. Zhang, M. Bai, N. Yao, H. Wu, H. Wu, C.  
516 Ji, H. Zheng, Y. Chen, S. Ye, X. Li, X. Zhao, R. Li, Y.-G. Liu, A detrimental mitochondrial-nuclear  
517 interaction causes cytoplasmic male sterility in rice. *Nature Genetics*. **45**, 573–577 (2013).
- 518 33. H.-Y. Lee, J.-Y. Chou, L. Cheong, N.-H. Chang, S.-Y. Yang, J.-Y. Leu, Incompatibility of Nuclear  
519 and Mitochondrial Genomes Causes Hybrid Sterility between Two Yeast Species. *Cell*. **135**, 1065–  
520 1073 (2008).
- 521 34. M. R. Hanson, S. Bentolila, Interactions of Mitochondrial and Nuclear Genes That Affect Male  
522 Gametophyte Development. *The Plant Cell*. **16**, S154–S169 (2004).
- 523 35. Z. W. Culumber, H. S. Fisher, M. Tobler, M. Mateos, P. H. Barber, M. D. Sorenson, G. G. Rosenthal,  
524 Replicated hybrid zones of *Xiphophorus* swordtails along an elevational gradient. *Molecular Ecology*.  
525 **20**, 342–356 (2011).
- 526 36. H. S. Fisher, B. B. M. Wong, G. G. Rosenthal, Alteration of the chemical environment disrupts  
527 communication in a freshwater fish. *Proc. R. Soc. B.* **273**, 1187–1193 (2006).



- 528 37. M. Schumer, C. Xu, D. L. Powell, A. Durvasula, L. Skov, C. Holland, J. C. Blazier, S. Sankararaman,  
529 P. Andolfatto, G. G. Rosenthal, M. Przeworski, Natural selection interacts with recombination to  
530 shape the evolution of hybrid genomes. *Science*. **360**, 656–660 (2018).
- 531 38. M. Schumer, Y. Brandvain, Determining epistatic selection in admixed populations. *Mol Ecol*. **25**,  
532 2577–2591 (2016).
- 533 39. M. Schumer, R. Cui, D. L. Powell, R. Dresner, G. G. Rosenthal, P. Andolfatto, High-resolution  
534 mapping reveals hundreds of genetic incompatibilities in hybridizing fish species. *eLife*. **3**, e02535  
535 (2014).
- 536 40. M. Schumer, D. L. Powell, R. Corbett-Detig, “Versatile simulations of admixture and accurate local  
537 ancestry inference with *mixnmatch* and *ancestryinfer*” (preprint, Genomics, 2019), ,  
538 doi:10.1101/860924.
- 539 41. J. L. Haynes, Standardized Classification of Poeciliid Development for Life-History Studies. *Copeia*.  
540 **1995**, 147 (1995).
- 541 42. W. N. Tavalga, Embryonic development of the platyfish (*Platypoecilus*), the swordtail  
542 (*Xiphophorus*), and their hybrids. Bulletin of the AMNH ; v. 94, article 4. *Embryonic development in*  
543 *fish* (1949) (available at <http://digitallibrary.amnh.org/handle/2246/1000>).
- 544 43. A.-N. A. Agip, J. N. Blaza, H. R. Bridges, C. Viscomi, S. Rawson, S. P. Muench, J. Hirst, Cryo-EM  
545 structures of complex I from mouse heart mitochondria in two biochemically defined states. *Nature*  
546 *Structural & Molecular Biology*. **25**, 548–556 (2018).
- 547 44. D. Kampjut, L. A. Sazanov, The coupling mechanism of mammalian respiratory complex I. *Science*  
548 (2020), doi:10.1126/science.abc4209.

- 549 45. K. Fiedorczuk, J. A. Letts, G. Degliesposti, K. Kaszuba, M. Skehel, L. A. Sazanov, Atomic structure  
550 of the entire mammalian mitochondrial complex I. *Nature*. **538**, 406–410 (2016).
- 551 46. K. L. Mack, M. W. Nachman, Gene Regulation and Speciation. *Trends in Genetics*. **33**, 68–80  
552 (2017).
- 553 47. M. Källberg, H. Wang, S. Wang, J. Peng, Z. Wang, H. Lu, J. Xu, Template-based protein structure  
554 modeling using the RaptorX web server. *Nature Protocols*. **7**, 1511–1522 (2012).
- 555 48. G. E. Hill, Mitonuclear Compensatory Coevolution. *Trends in Genetics* (2020),  
556 doi:10.1016/j.tig.2020.03.002.
- 557 49. R. Cui, M. Schumer, K. Kruesi, R. Walter, P. Andolfatto, G. G. Rosenthal, Phylogenomics reveals  
558 extensive reticulate evolution in *Xiphophorus* fishes. *Evolution*. **67**, 2166–2179 (2013).
- 559 50. D. B. Sloan, J. C. Havird, J. Sharbrough, The on-again, off-again relationship between mitochondrial  
560 genomes and species boundaries. *Molecular Ecology*. **26**, 2212–2236 (2017).
- 561 51. Q. K. Langdon, D. L. Powell, B. Kim, S. M. Banerjee, C. Payne, T. O. Dodge, B. Moran, P.  
562 Fascinetto-Zago, M. Schumer, *bioRxiv*, in press, doi:10.1101/2021.07.06.451368.
- 563 52. C. K. Ellison, R. S. Burton, Disruption of Mitochondrial Function in Interpopulation Hybrids of  
564 *Tigriopus Californicus*. *Evolution*. **60**, 1382–1391 (2006).
- 565 53. C. K. Ellison, O. Niehuis, J. Gadau, Hybrid breakdown and mitochondrial dysfunction in hybrids of  
566 *Nasonia* parasitoid wasps. *Journal of Evolutionary Biology*. **21**, 1844–1851 (2008).
- 567 54. J. R. Olson, S. J. Cooper, D. L. Swanson, M. J. Braun, J. B. Williams, The Relationship of Metabolic  
568 Performance and Distribution in Black-Capped and Carolina Chickadees. *Physiological and*  
569 *Biochemical Zoology*. **83**, 263–275 (2010).

- 570 55. D. L. Powell, M. García-Olazábal, M. Keegan, P. Reilly, K. Du, A. P. Díaz-Loyo, S. Banerjee, D.  
571 Blakkan, D. Reich, P. Andolfatto, G. G. Rosenthal, M. Scharl, M. Schumer, Natural hybridization  
572 reveals incompatible alleles that cause melanoma in swordtail fish. *Science*. **368**, 731–736 (2020).
- 573 56. Y. Lu, A. Sandoval, S. Voss, Z. Lai, S. Kneitz, W. Boswell, M. Boswell, M. Savage, C. Walter, W.  
574 Warren, M. Scharl, R. Walter, Oncogenic allelic interaction in *Xiphophorus* highlights hybrid  
575 incompatibility. *PNAS*. **117**, 29786–29794 (2020).
- 576 57. T. C. Nelson, A. M. Stathos, D. D. Vanderpool, F. R. Finseth, Y. Yuan, L. Fishman, Ancient and  
577 recent introgression shape the evolutionary history of pollinator adaptation and speciation in a model  
578 monkeyflower radiation (*Mimulus* section *Erythranthe*). *PLOS Genetics*. **17**, e1009095 (2021).
- 579

580 **Acknowledgements**

581

582 We thank Peter Andolfatto, Stepfanie Aguillon, Yaniv Brandvain, Jenn Coughlan, Hunter Fraser,  
583 Yuki Haba, Molly Przeworski, Ken Thompson and members of the Schumer lab for helpful  
584 discussion and/or feedback on earlier versions of this manuscript. We thank the Federal  
585 Government of Mexico for permission to collect fish. Stanford University and the Stanford  
586 Research Computing Center provided computational support for this project. We thank the  
587 Vincent Coates Foundation Mass Spectrometry Laboratory, Stanford University Mass  
588 Spectrometry (RRID:SCR\_017801) for technical and experimental support. **Funding:** This work  
589 was supported by a Knight-Hennessy Scholars fellowship and NSF GRFP 2019273798 to B.  
590 Moran, a CEHG fellowship and NSF PRFB (2010950) to Q. Langdon, NIH P30 CA124435 in  
591 utilizing the Stanford Cancer Institute Proteomics/Mass Spectrometry Shared Resource, NIH  
592 grant 1R35GM142836 to J. Havird, and a Hanna H. Gray fellowship, Sloan Fellowship, and NIH  
593 grant 1R35GM133774 to M. Schumer. **Author Contributions:** B.M.M., D.L.P, and M. Schu,  
594 designed the project; B.M.M., C.Y.P., E.N.K.I., S.M.B, F.L., R.M., K.S., O.H.-P., J.C.H., and  
595 M.Schu. collected data; B.M.M., C.Y.P., Q.L.K., F.L., J.C.H., and M. Schu. performed analyses;  
596 D.L.P., T.R.G., R.D.L., R.C.-D., and M. Scha. provided expertise and technical support.

597 **Competing Interests:** The authors declare no competing interests. **Data and materials**  
598 **availability:** All data are available through NCBI (see Supplementary Materials) and Dryad  
599 (pending). Code is available on Github at [https://github.com/Schumerlab/mitonuc\\_DMI](https://github.com/Schumerlab/mitonuc_DMI).

600

601 **Supplementary Materials**

602 Materials and Methods

603 Tables S1 – S11

604 Figs. S1 – S27
